# Supplementary material for: Parameter calibration in global soil carbon models using surrogate-based optimization
Source: Copernicus journal article supplement (doi:10.5194/gmd-11-3027-2018), 2018-07-27
Supplement: Supplementary file 1 [file gmd-11-3027-2018-supplement.zip]

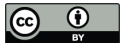

## *Supplement of*

# **Parameter calibration in global soil carbon models using surrogate-based optimization**

**Haoyu Xu et al.**

*Correspondence to:* Wei Xue (xuewei@tsinghua.edu.cn)

- gmd-11-3027-2018-supplement-title-page.pdf
- Supplement
  - .DS\_Store
  - GlobalOptimization
    - \* CMAES.m
    - \* DE.m
    - \* PSO.m
    - \* SCEUA.m
    - \* carbon1data.mat
    - \* carbon2data.mat
    - \* carbon3data.mat
    - \* datainput\_Carbon1.m
    - \* datainput\_Carbon2.m
    - \* datainput\_Carbon3.m
    - \* run.m
    - \* run.m
  - MCMC
    - \* .DS\_Store
    - \* CLM-CASA
    - \* microbial
  - SurrogateOptimization
    - \* carbon1data.mat
    - \* carbon2data.mat
    - \* carbon3data.mat
    - \* datainputCarbon1.m
    - \* datainputCarbon2.m

- \* datainputCarbon3.m
- \* run.m
- readme.pdf

The copyright of individual parts of the supplement might differ from the CC BY 3.0 License.
